# Supplementary figures and images for: Interphase microtubule disassembly is a signaling cue that drives cell rounding at mitotic entry
Source: PubMed Central journal article supplement — J Cell Biol. 2022 Apr 28;221(6):e202109065. doi: 10.1083/jcb.202109065 (PMC9059391; doi:10.1083/jcb.202109065), 2022-04-28

**Fig 1D**

(HEK293T cells)

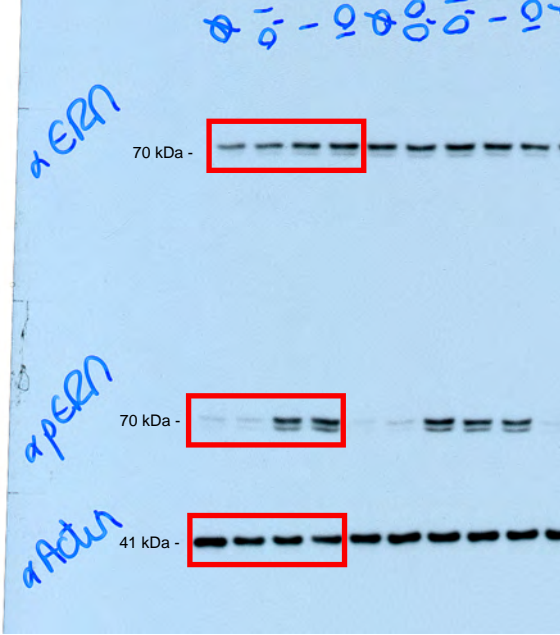

**Fig 1D**

(HeLa cells)

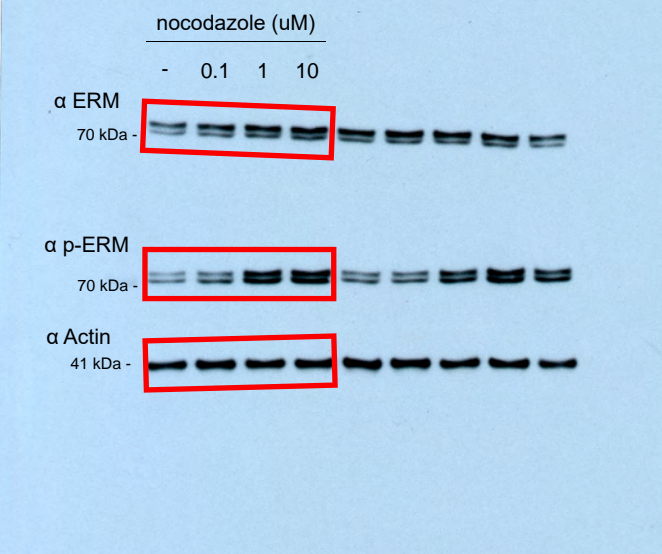

**Fig 1F**

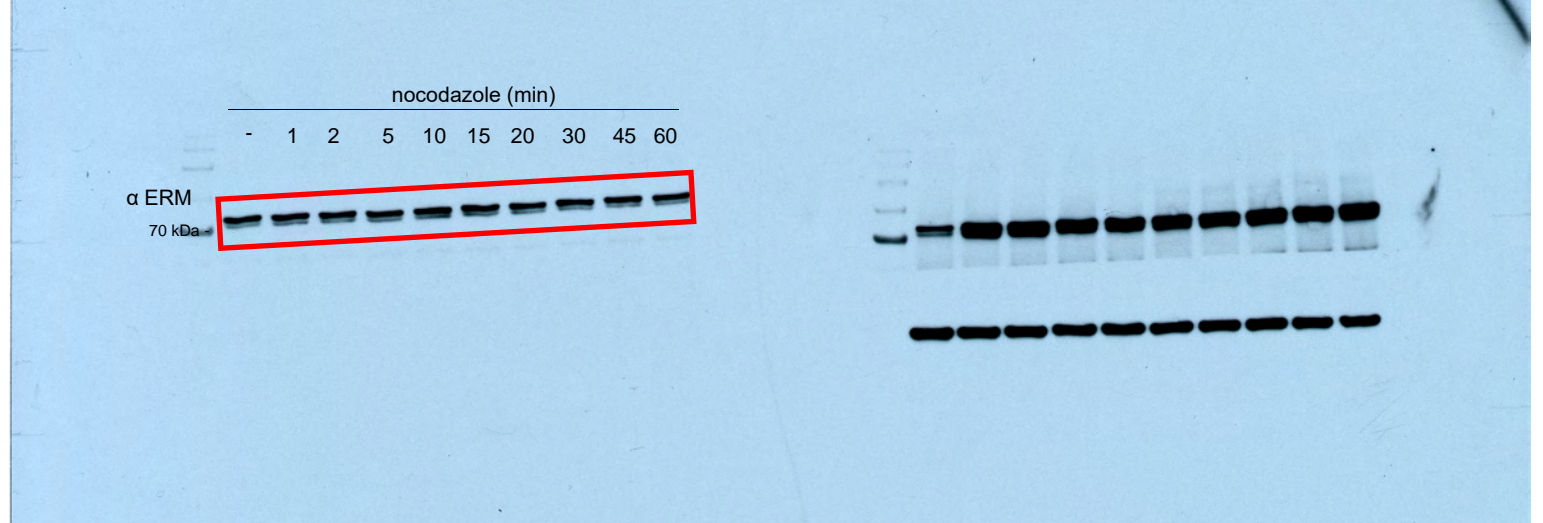

**Fig 1F**

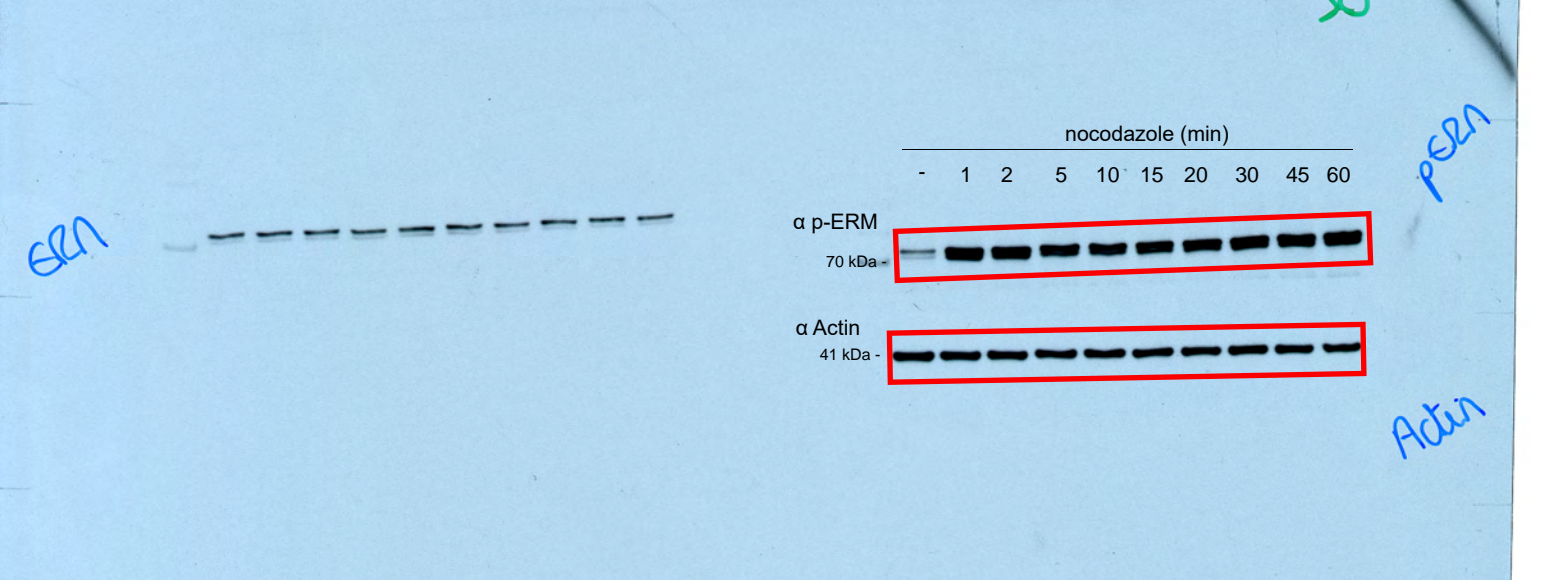

Supplement: JCB_202109065_SourceDataF1.pdf [file JCB_202109065_SourceDataF1.pdf]

**Fig 2A**

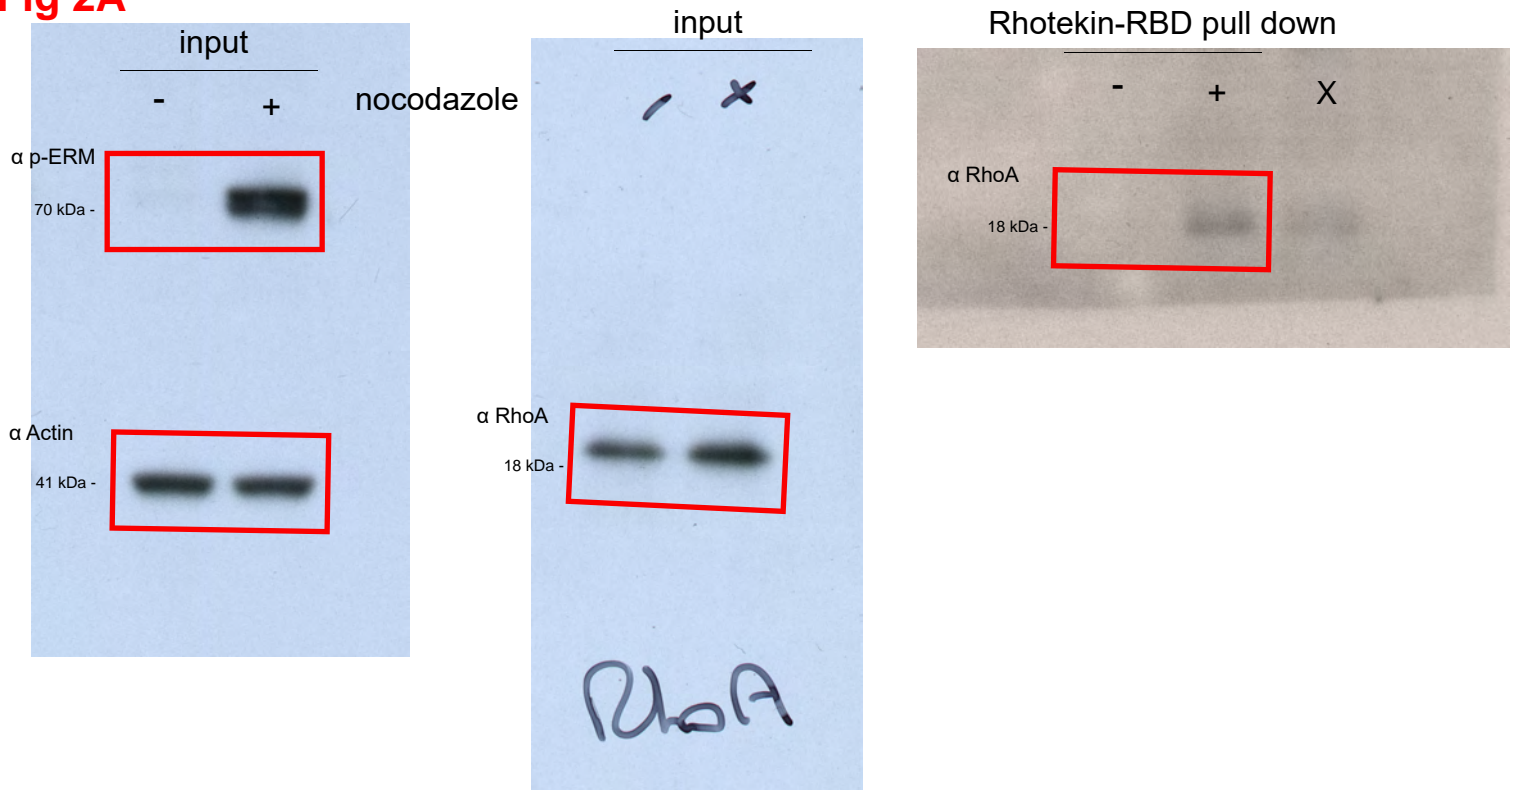

**Fig 2C**

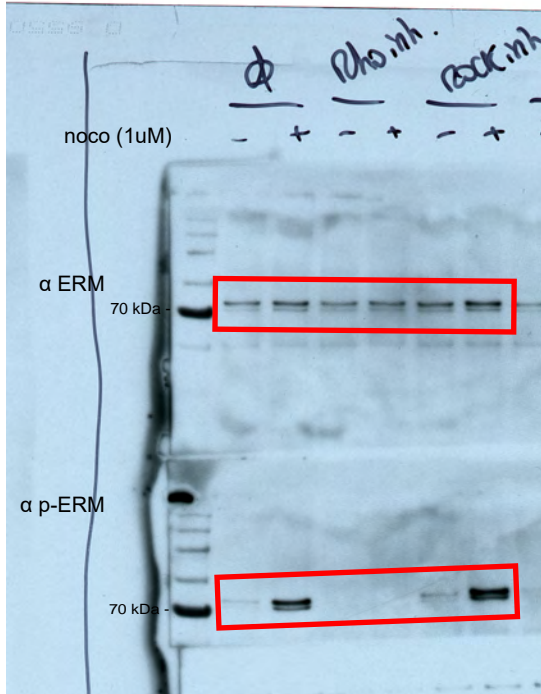

Supplement: JCB_202109065_SourceDataF2.pdf [file JCB_202109065_SourceDataF2.pdf]

**Fig 3A**

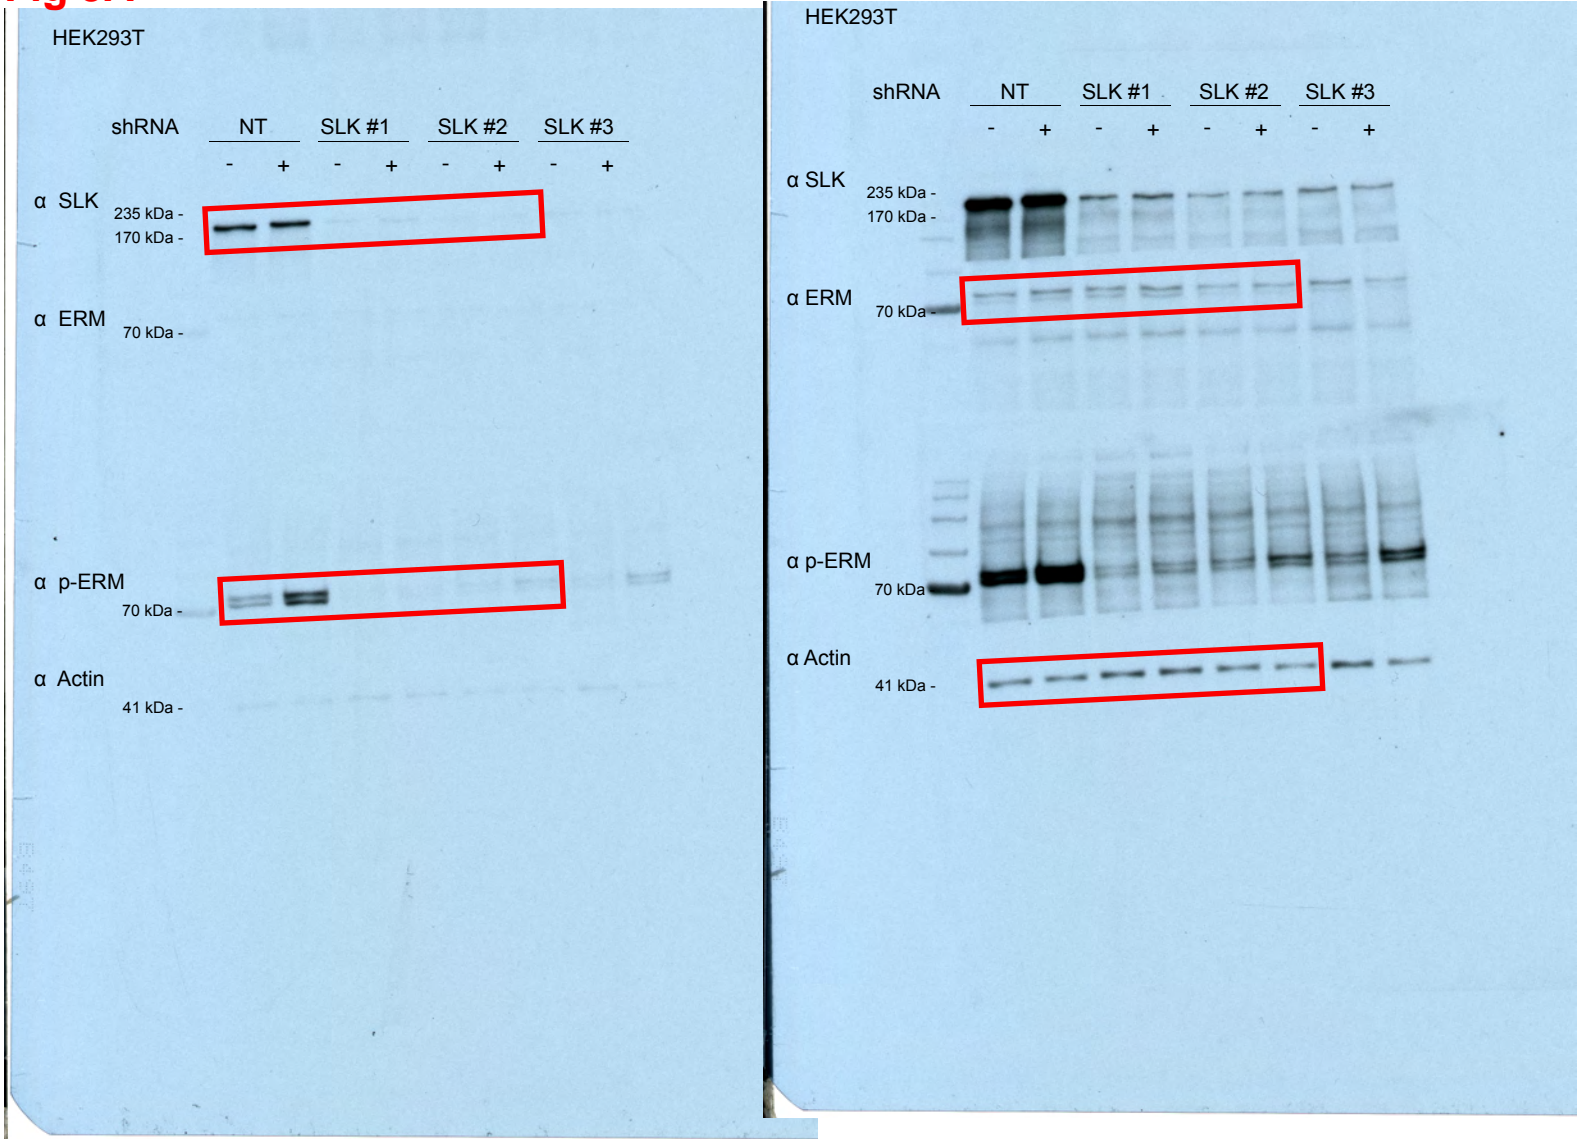



**Fig 3C**

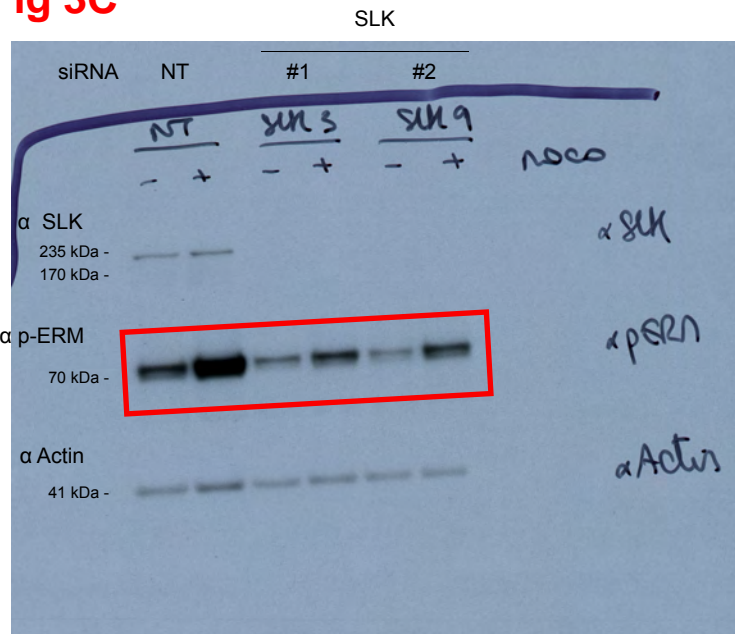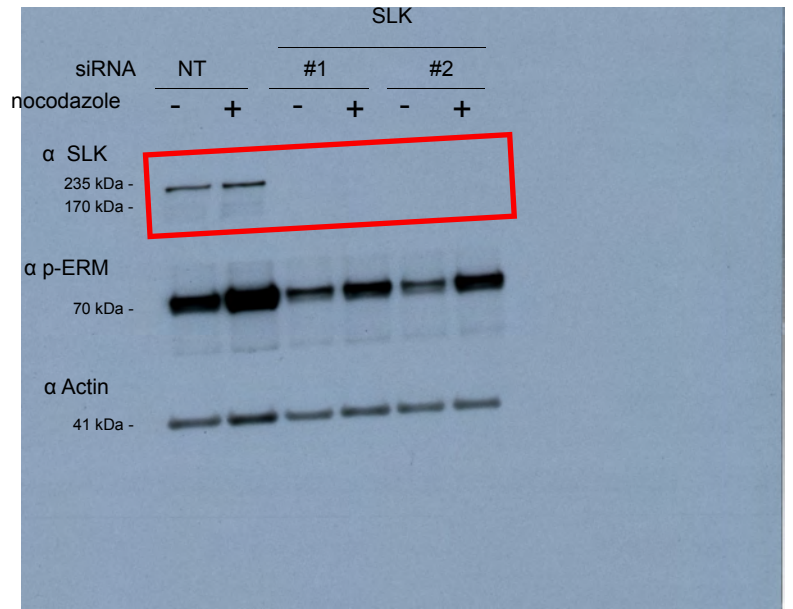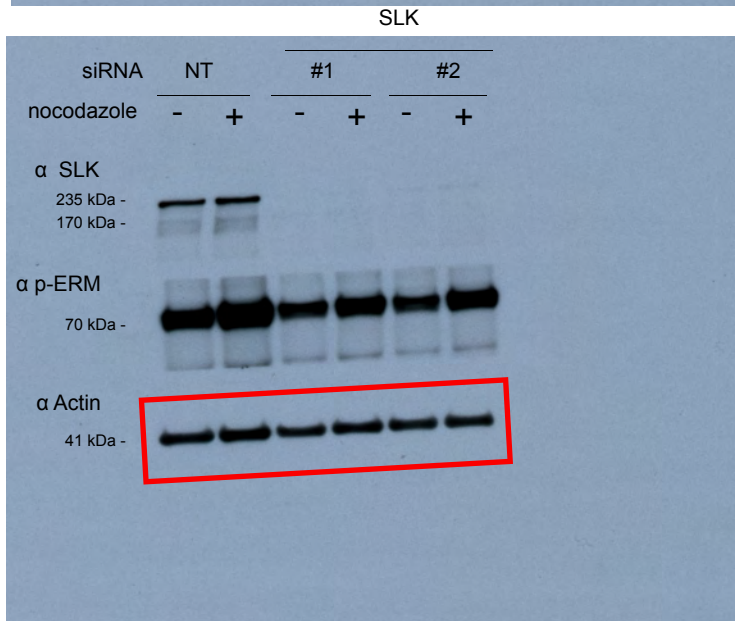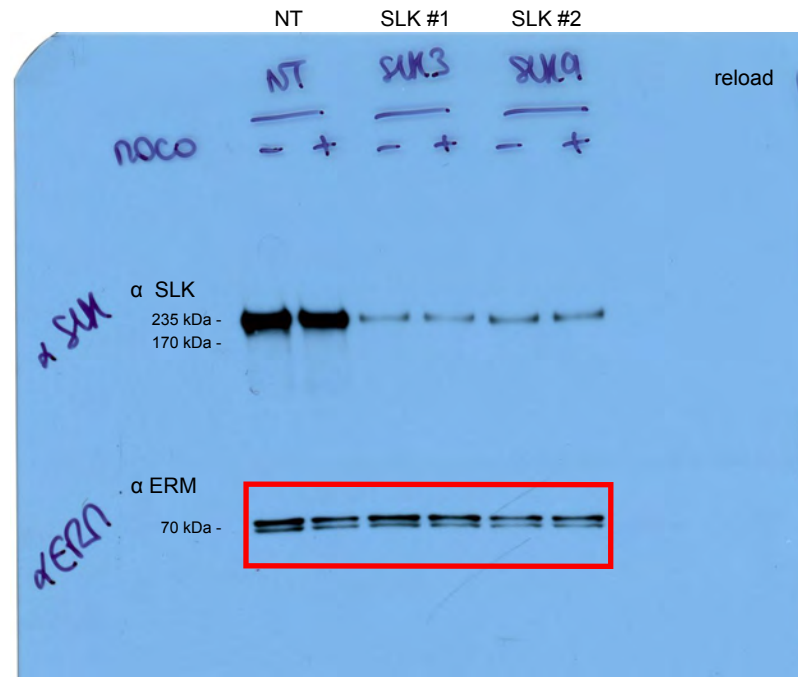

**Fig 3E**

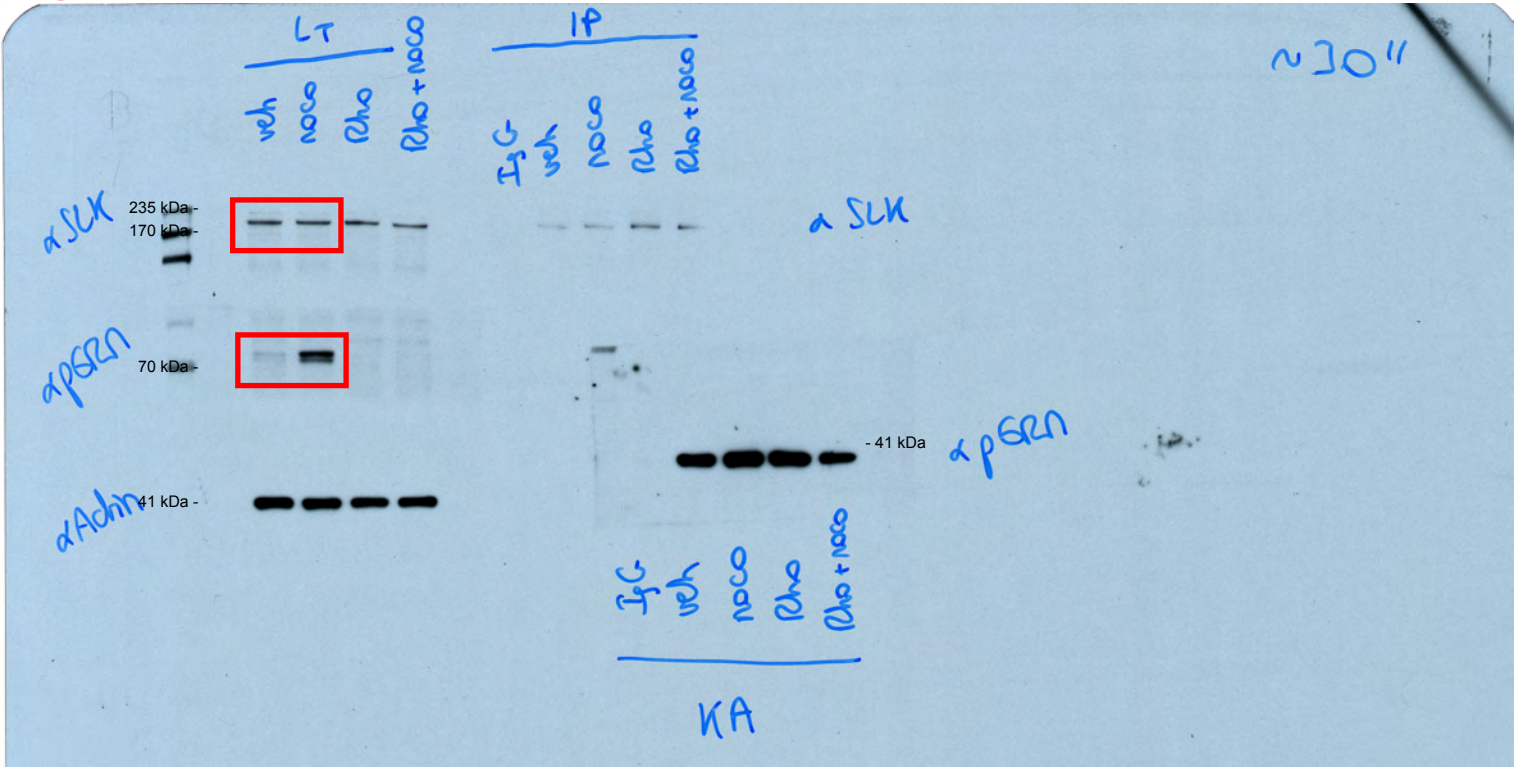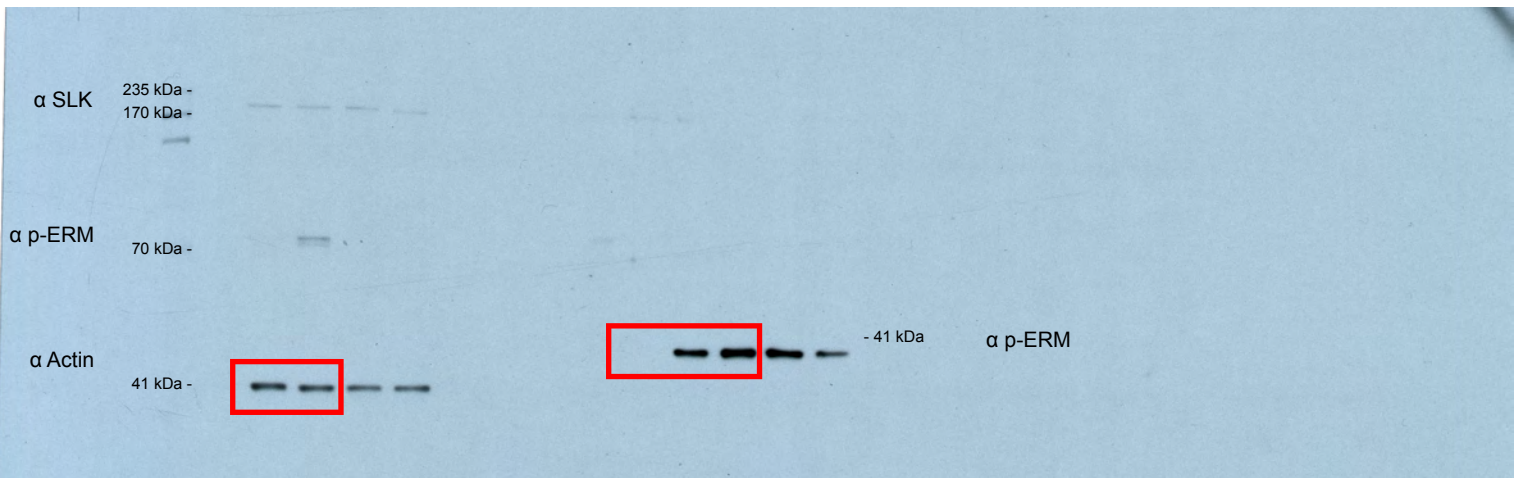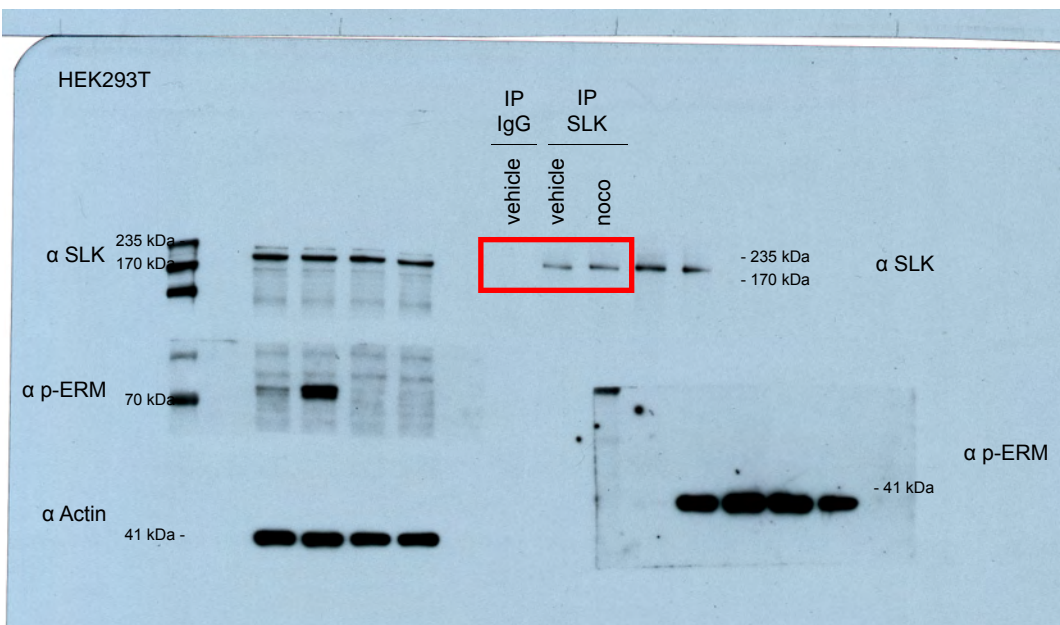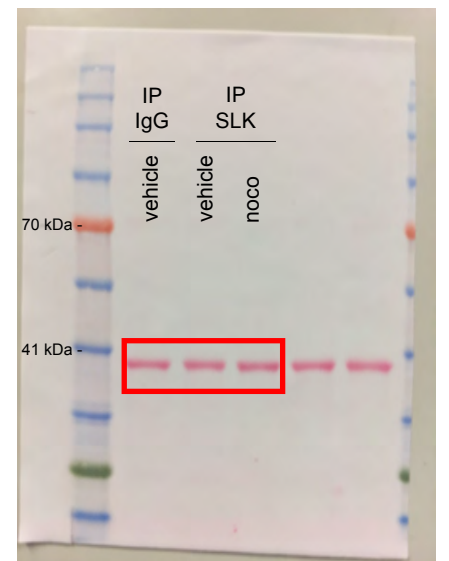

Supplement: JCB_202109065_SourceDataF3.pdf [file JCB_202109065_SourceDataF3.pdf]

**Fig 5D**

~5''

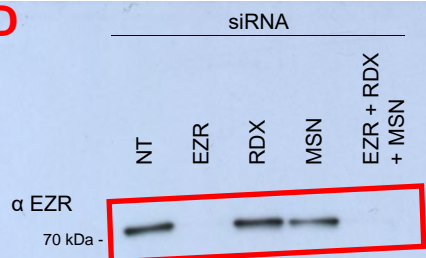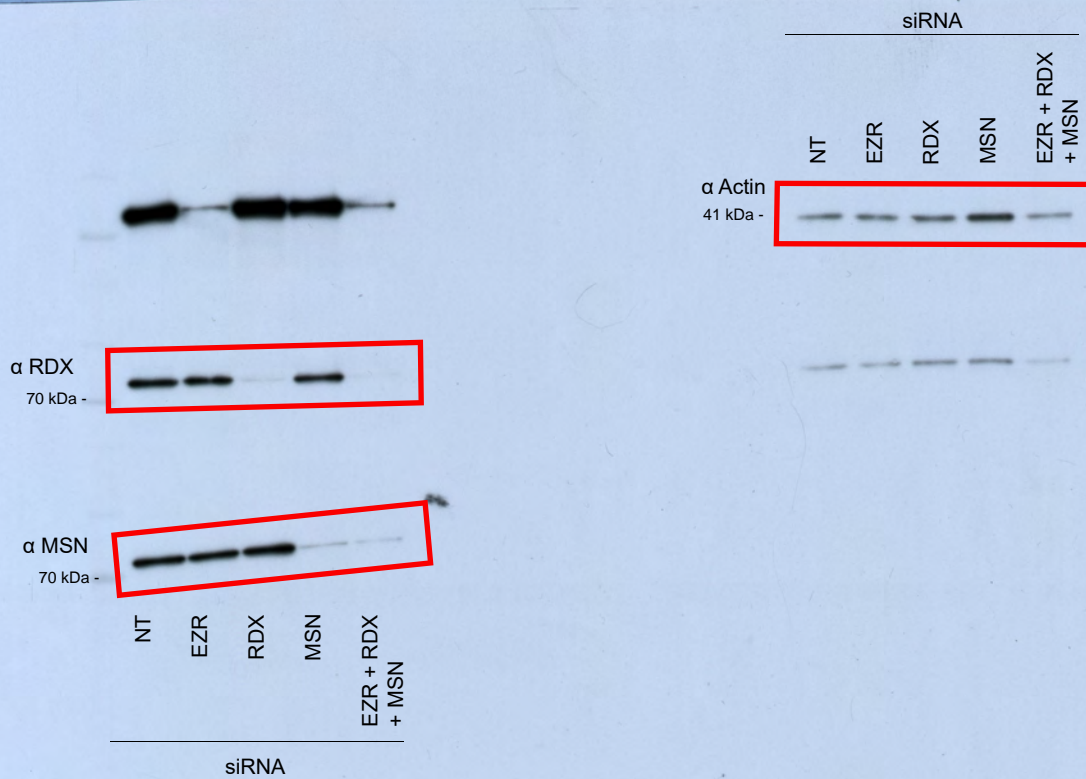

**Fig 5H**

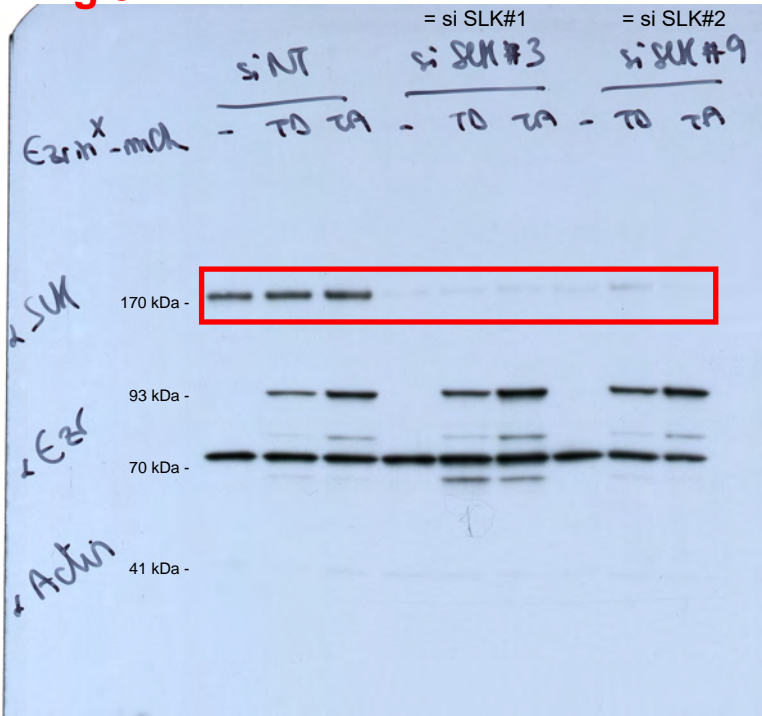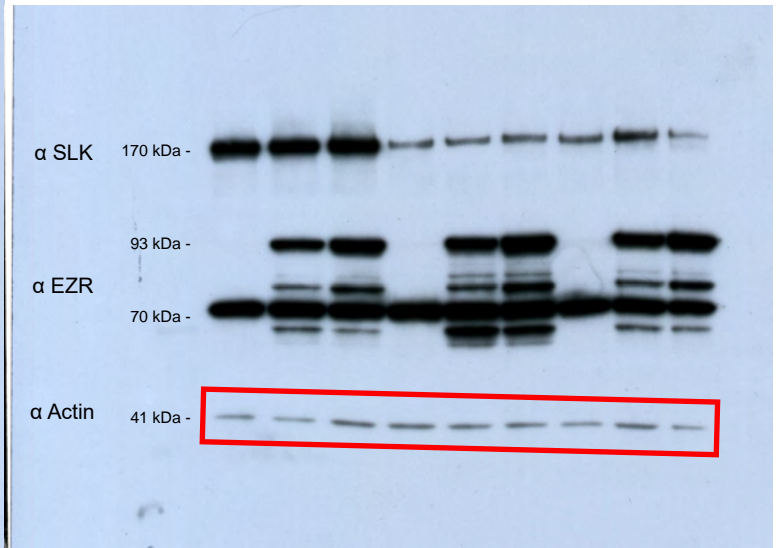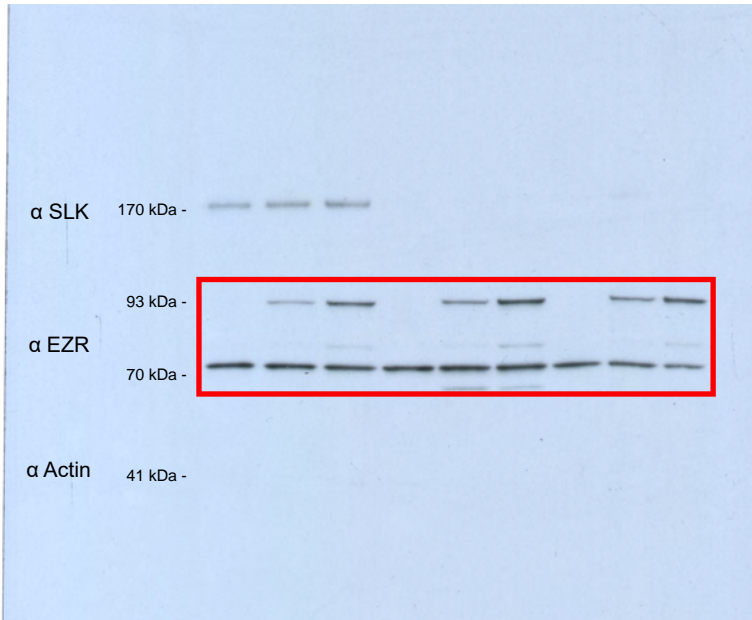

Supplement: JCB_202109065_SourceDataF5.pdf [file JCB_202109065_SourceDataF5.pdf]

**Fig S1E**

(HEK293T cells)

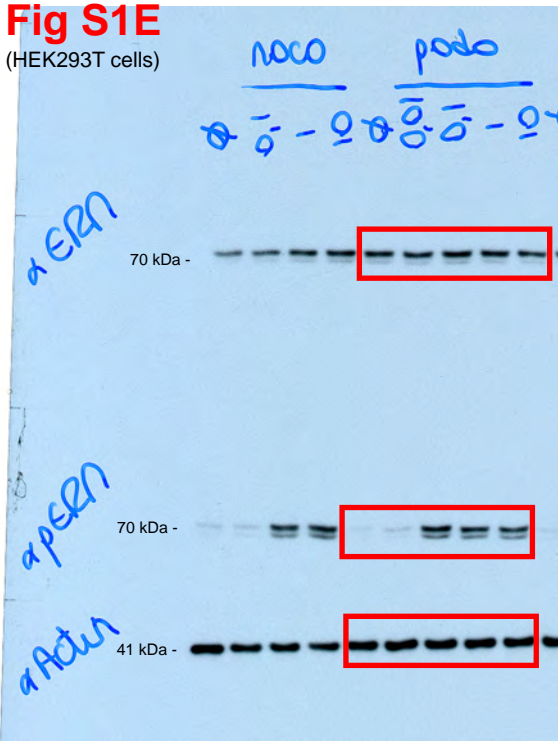

**Fig S1E**

(HeLa cells)

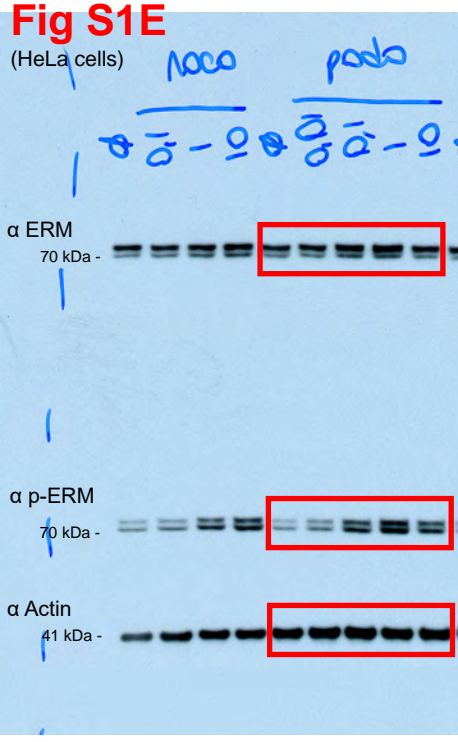

**Fig S1J**

~ 24

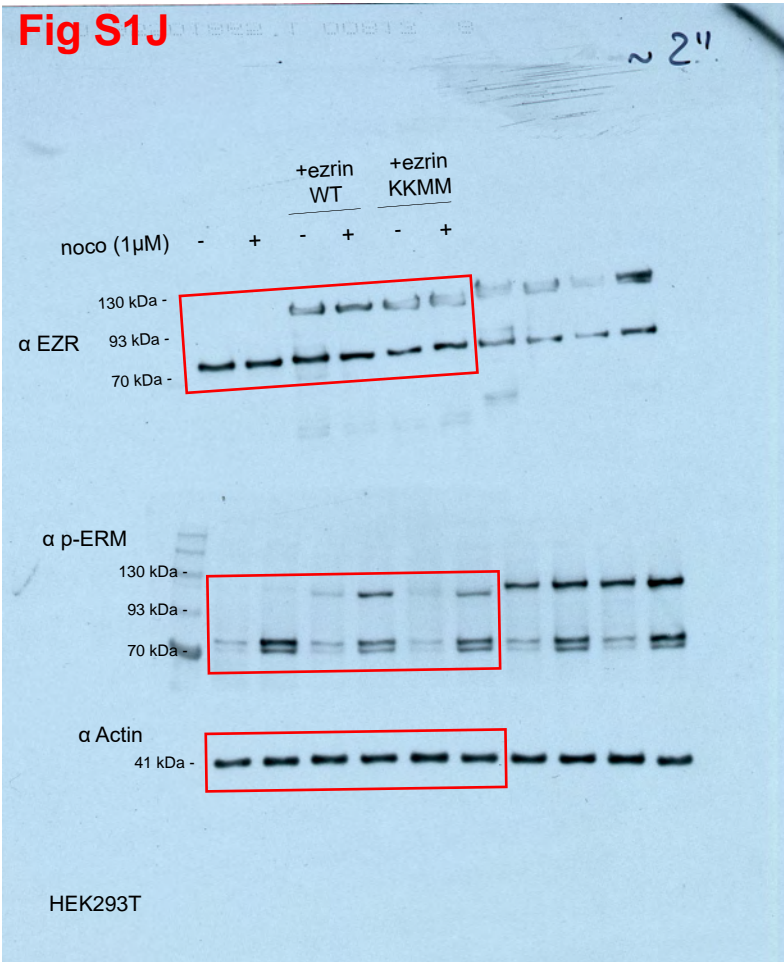

**Fig S1G**

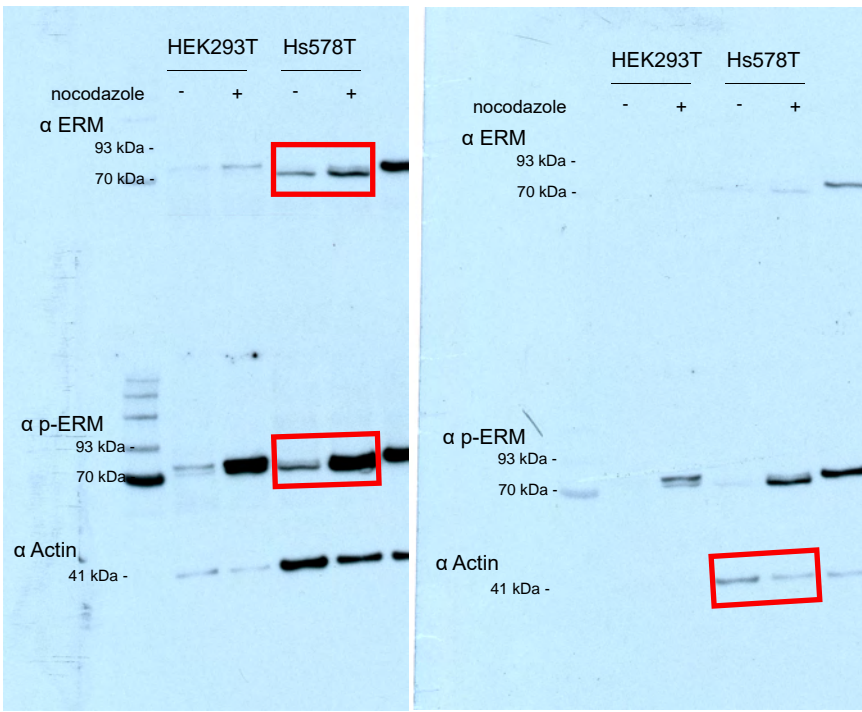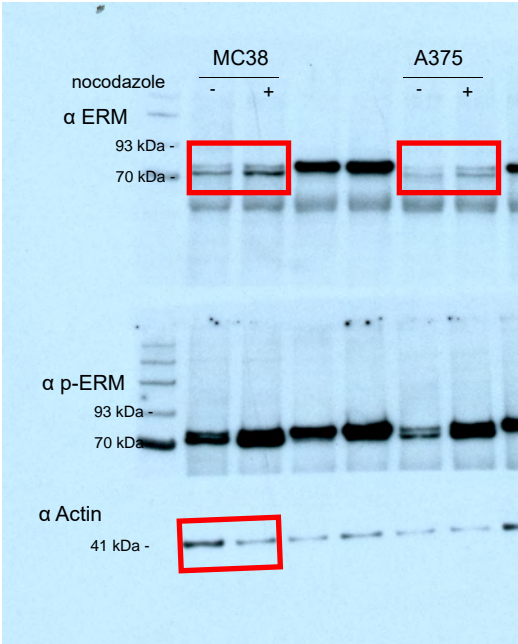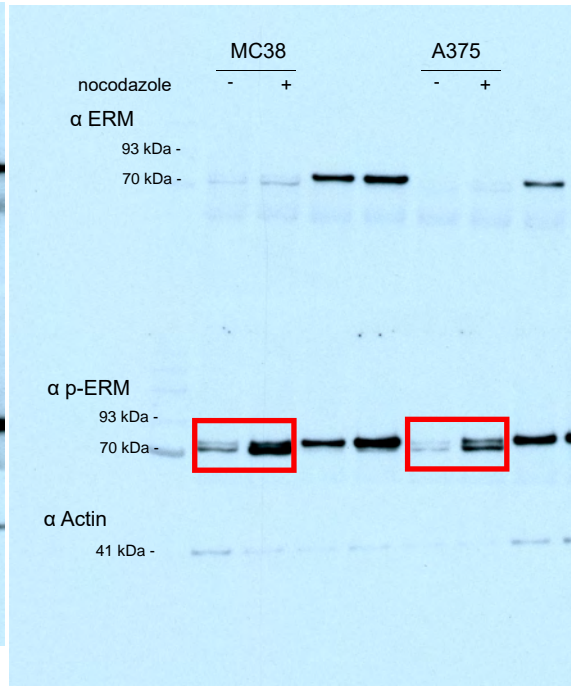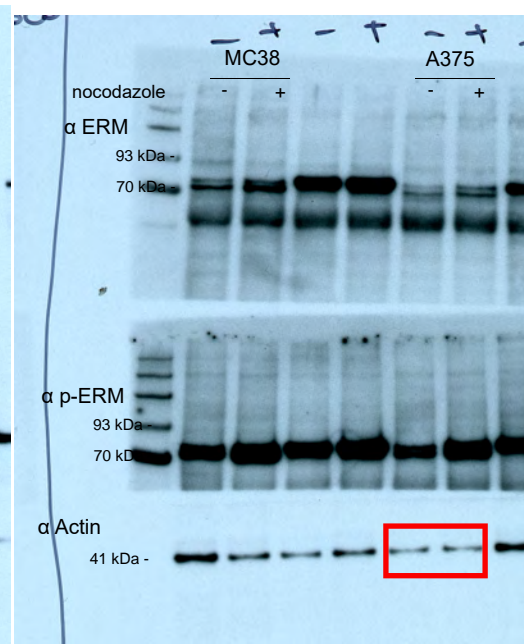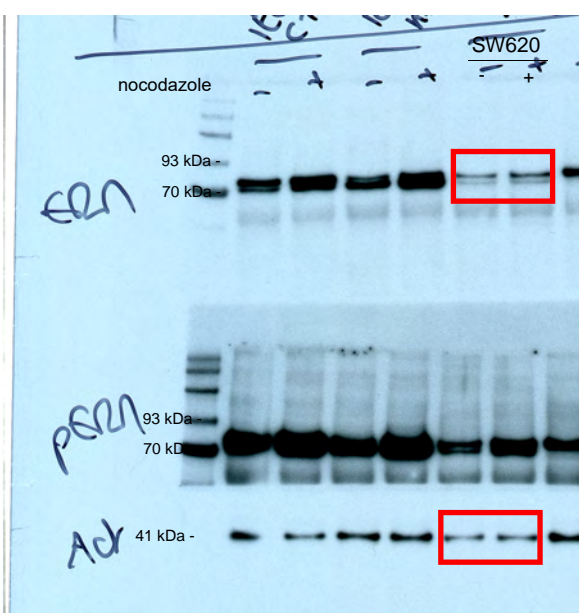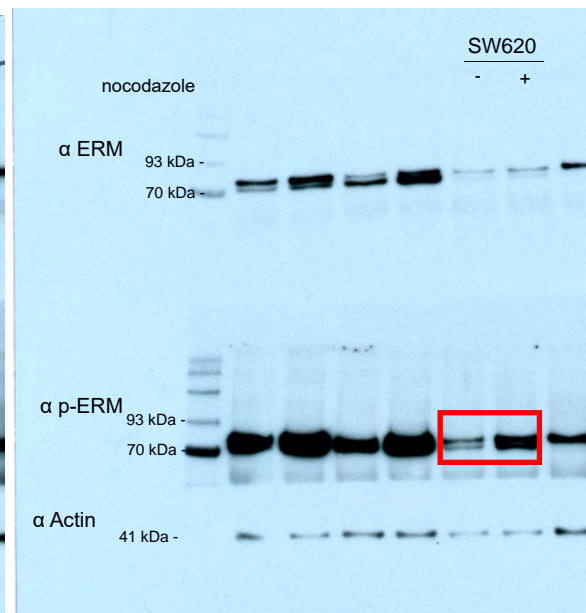

Supplement: JCB_202109065_SourceDataFS1.pdf [file JCB_202109065_SourceDataFS1.pdf]

**Fig S2C**

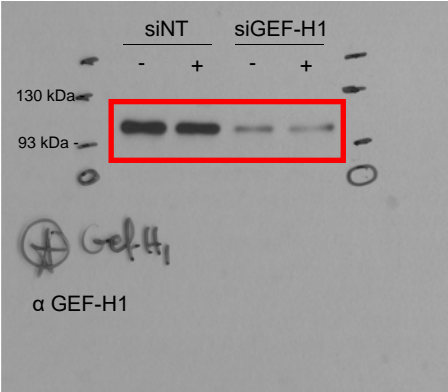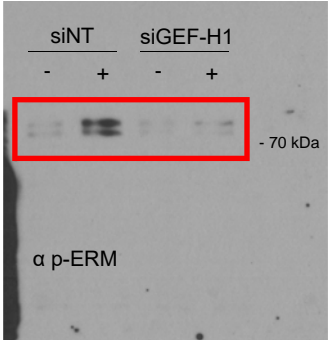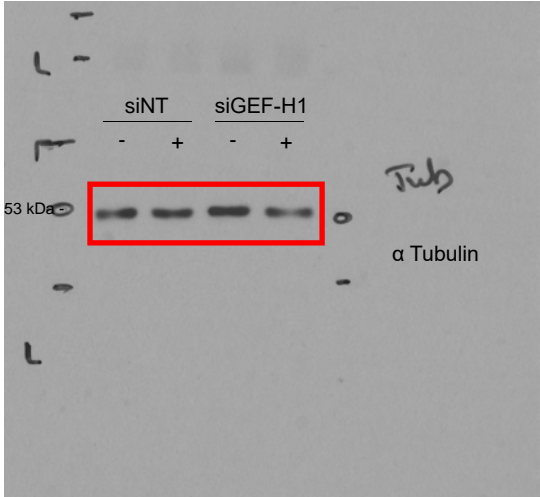

Supplement: JCB_202109065_SourceDataFS2.pdf [file JCB_202109065_SourceDataFS2.pdf]

**Fig S5A**

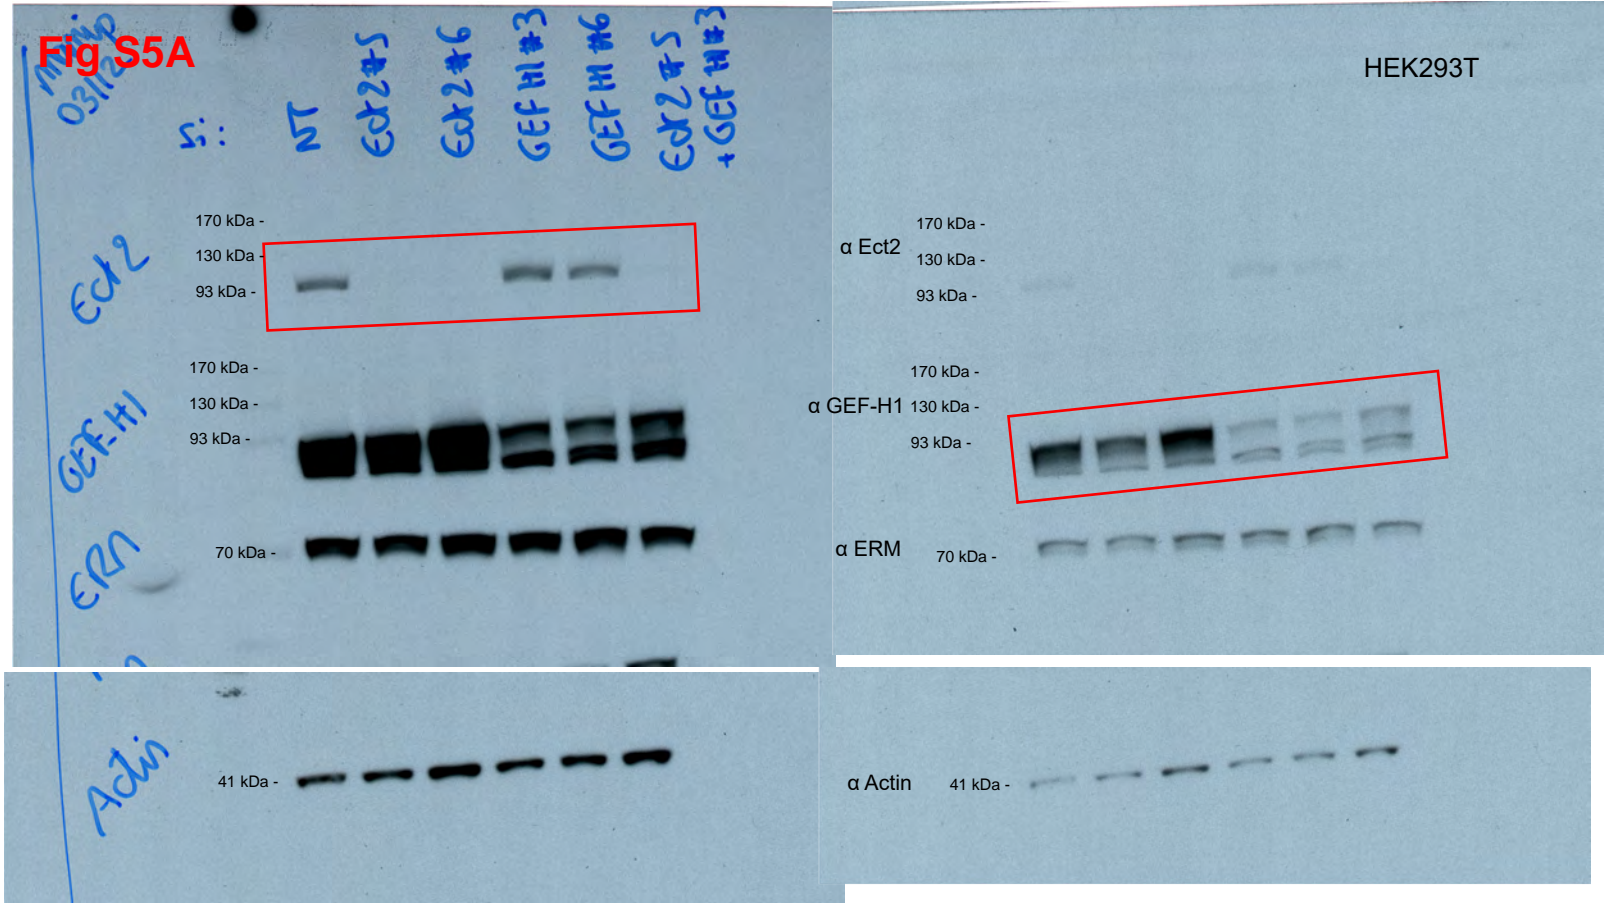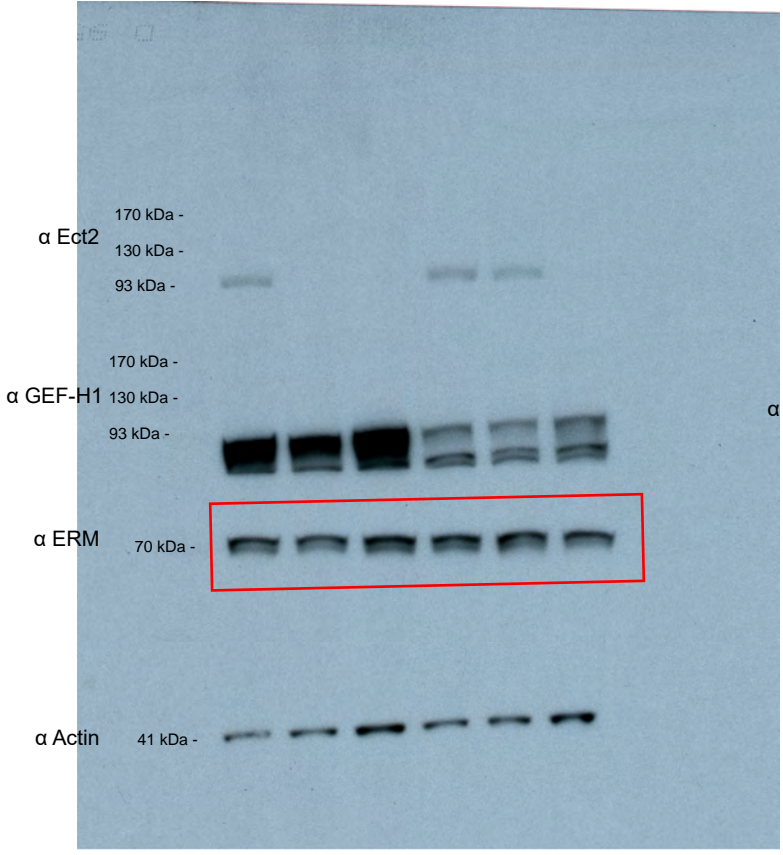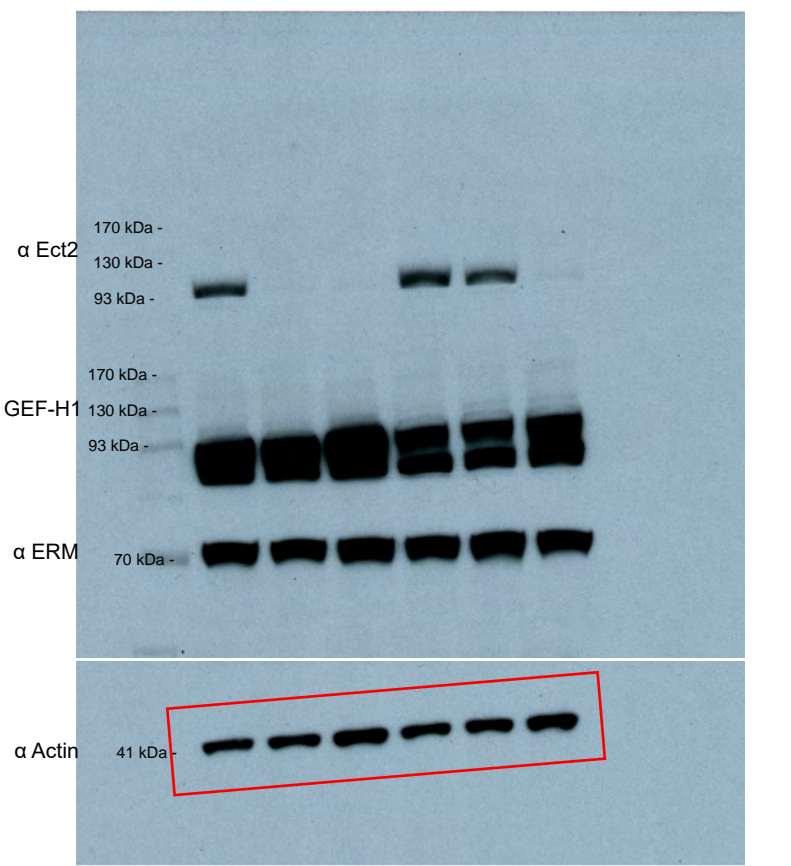

Supplement: JCB_202109065_SourceDataFS5.pdf [file JCB_202109065_SourceDataFS5.pdf]
